# Supplementary material for: Telmisartan induces browning of fully differentiated white adipocytes via M2 macrophage polarization
Source: PubMed Central journal article supplement (PMC6362091; doi:10.1038/s41598-018-38399-1), 2019-02-04
Supplement: 41598_2018_38399_MOESM1_ESM.pdf [file 41598_2018_38399_MOESM1_ESM.pdf]

# **Telmisartan induces browning of fully differentiated white adipocytes via M2 macrophage polarization**

Eun Jeong Jeon, Dong Young Kim, Na Hyun Lee, Hye-Eun Choi, Hye Gyeong Cheon\*

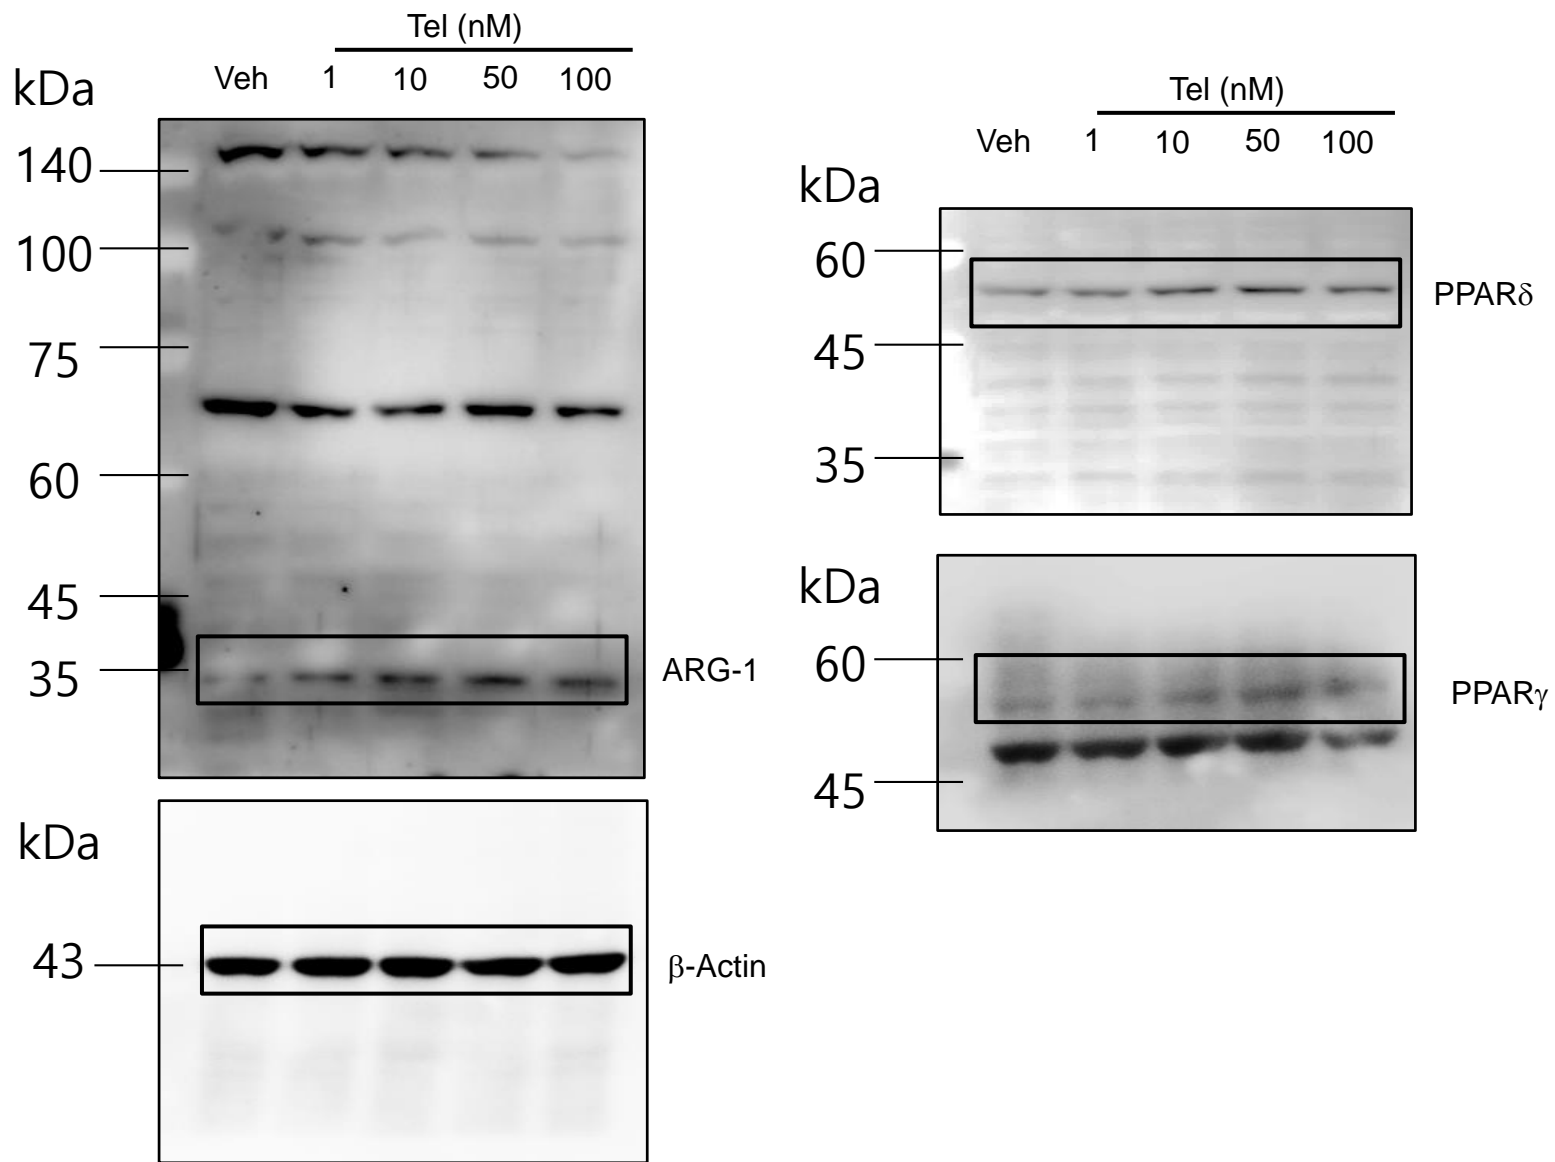

Supplementary Figure 1. Uncropped scans of western blot displayed in Fig. 1b

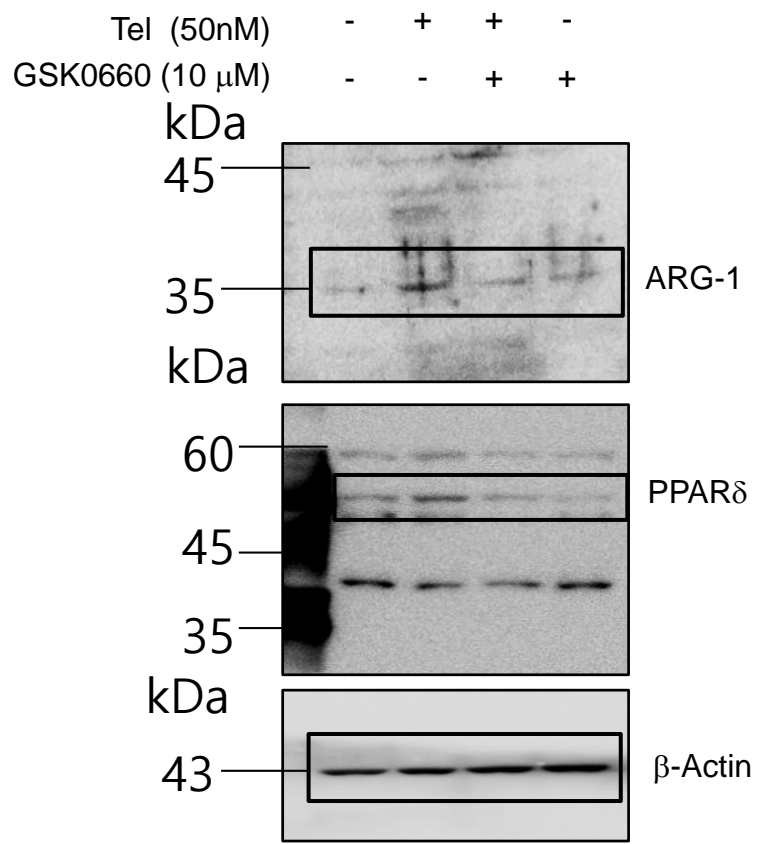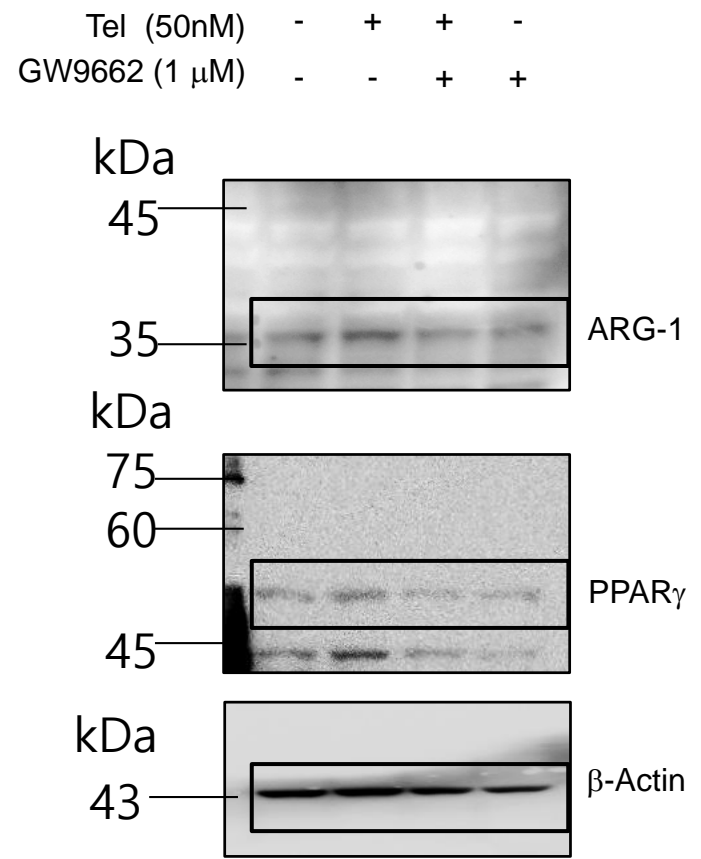

**Supplementary Figure 2. Uncropped scans of western blot displayed in Fig. 3c**

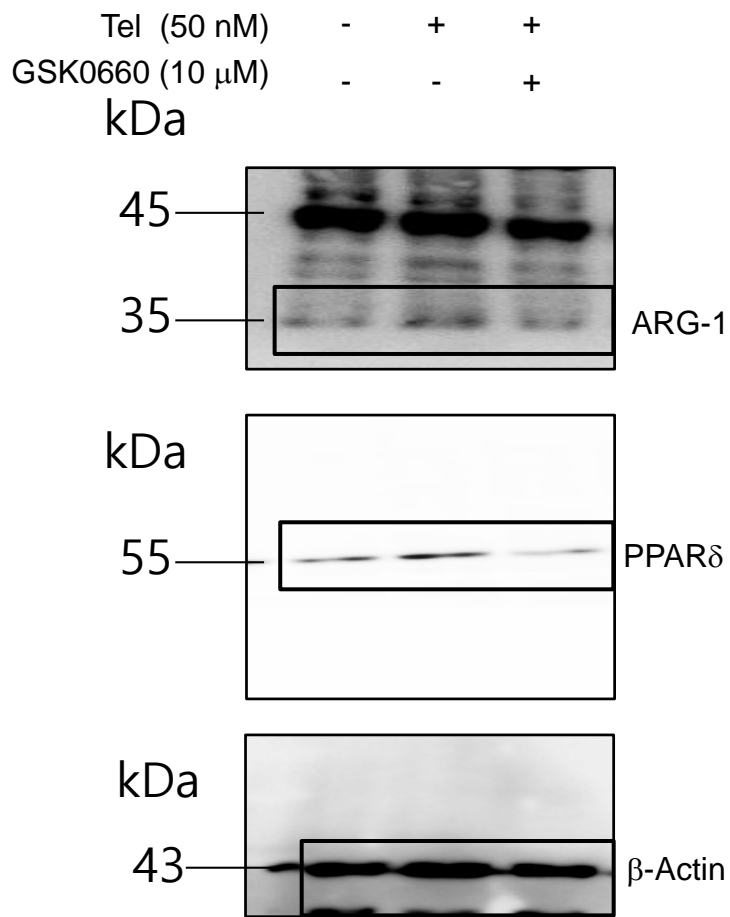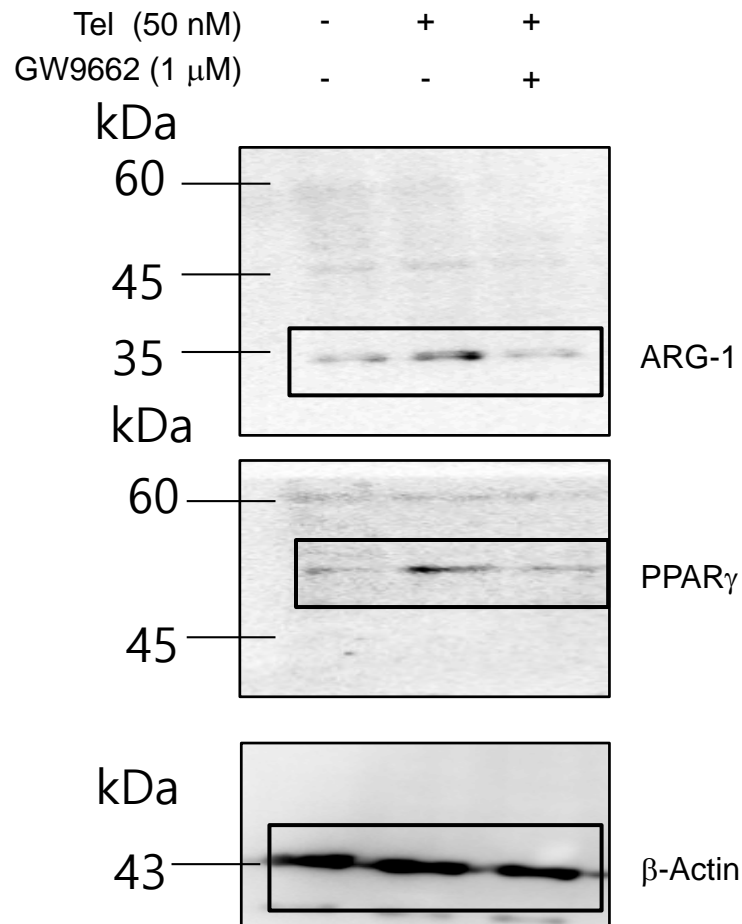

**Supplementary Figure 3. Uncropped scans of western blot displayed in Fig. 3d**

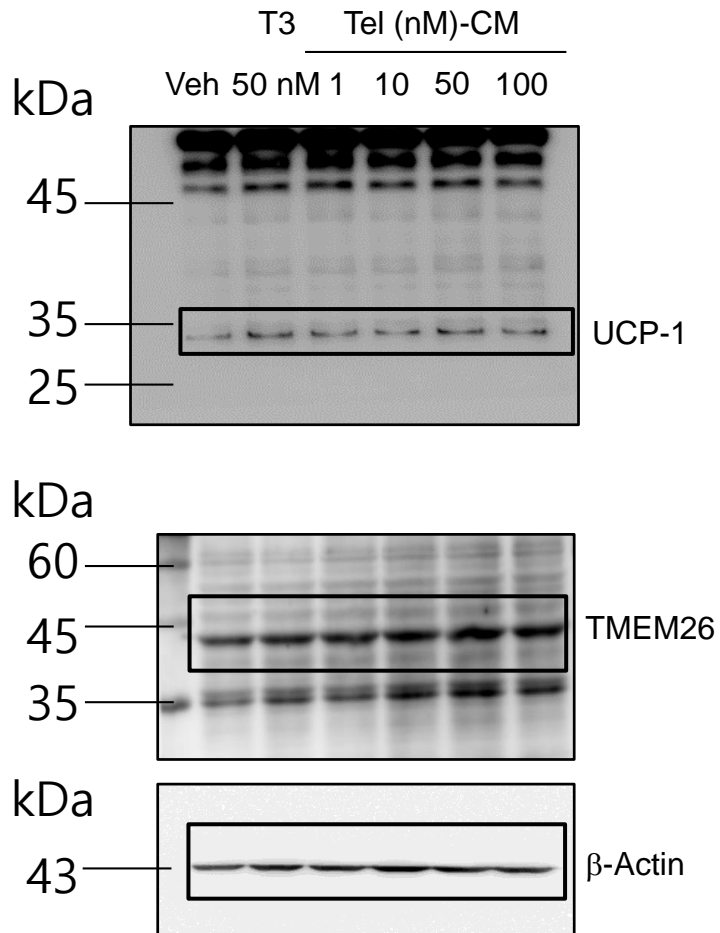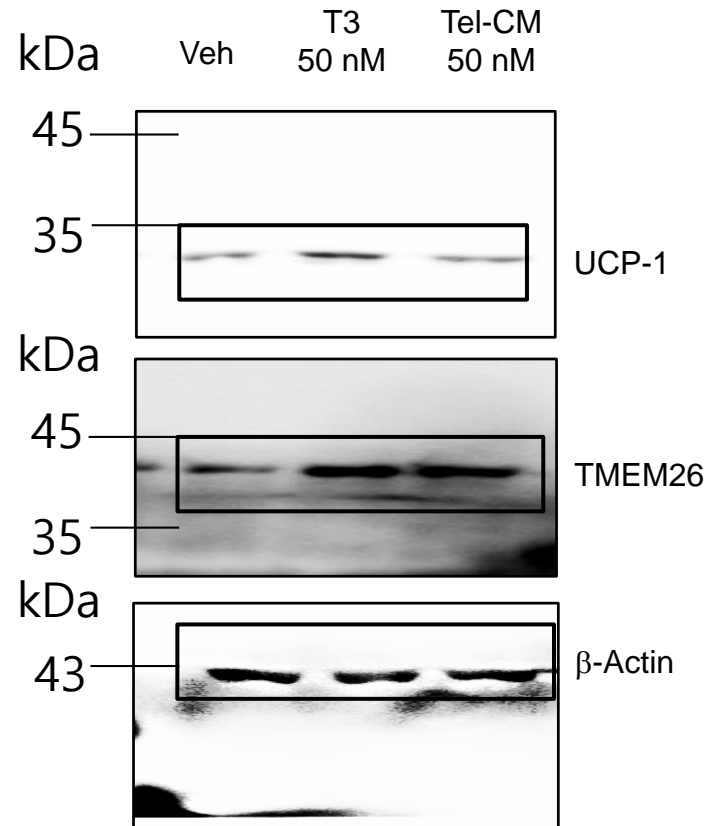

**Supplementary Figure 4. Uncropped scans of western blot displayed in Fig. 4b, and e**
